1 **Assessing the effectiveness of oxathiapiprolin towards *Phytophthora***  
2 ***agathidicida*, the causal agent of kauri dieback disease**

3

4 Randy F. Lacey,<sup>1</sup> Michael J. Fairhurst,<sup>1</sup> Kaitlyn J. Daley,<sup>1</sup> Te Amohaere Ngata-  
5 Aerengamate,<sup>1</sup> Haileigh R. Patterson,<sup>1</sup> Wayne M. Patrick,<sup>1</sup> and Monica L. Gerth<sup>1\*</sup>

6

7 <sup>1</sup> Centre for Biodiscovery, School of Biological Sciences, Victoria University of  
8 Wellington, Wellington 6012, Aotearoa New Zealand.

9

10 \*Corresponding author: M. L. Gerth; E-mail: [monica.gerth@vuw.ac.nz](mailto:monica.gerth@vuw.ac.nz)

11

12 **Abstract**

13

14 *Phytophthora* species cause disease and devastation of plants in ecological and  
15 horticultural settings worldwide. A recently identified species, *P. agathidicida*, infects and  
16 ultimately kills the treasured kauri trees that are endemic to New Zealand. Currently  
17 there are few options for controlling or treating *P. agathidicida*. In this study, we sought  
18 to assess the toxicity of the oomycide oxathiapiprolin against several lifecycle stages of  
19 two geographically distinct *P. agathidicida* isolates. Half maximal effective concentration  
20 (EC<sub>50</sub>) values were determined to be approximately 0.1 ng/ml for inhibiting mycelial  
21 growth, indicating that *P. agathidicida* mycelia are more sensitive to oxathiapiprolin than  
22 those from most other *Phytophthora* species that have been studied. Oxathiapiprolin  
23 was also highly effective at inhibiting the germination of zoospores (EC<sub>50</sub> = 2-9 ng/ml for  
24 the two isolates) and oospores (complete inhibition at 100 ng/ml). In addition,  
25 oxathiapiprolin delayed the onset of detached kauri leaf infection in a dose-dependent  
26 manner. Collectively, the results presented here highlight the significant potential of  
27 oxathiapiprolin as a tool to aid in the control of kauri dieback disease.

## 28 Introduction

29

30 Members of the oomycete genus *Phytophthora* cause disease and destruction to  
31 plants in agricultural and natural ecosystems worldwide (Hansen et al. 2012). For  
32 example, it has been estimated that the infamous causal agent of potato late blight,  
33 *Phytophthora infestans*, continues to cause >\$6 billion of damage yearly (Haverkort et  
34 al. 2008). In New Zealand, a recently identified species named *P. agathidicida* is  
35 threatening kauri (*Agathis australis*), which are treasured, long-lived native conifers  
36 (Bradshaw et al. 2020; Weir et al. 2015). Kauri are giant trees – the largest, Tāne  
37 Mahuta, has a trunk girth of over 13 m – and they have a vital ecological role as  
38 foundation species in the forests they inhabit (Wyse et al. 2014). *P. agathidicida* infects  
39 kauri of all ages *via* the roots, causing trunk lesions, canopy thinning, root and collar rot,  
40 and ultimately death (Bellgard et al. 2016). While kauri dieback disease was first  
41 documented in the 1970s, it has spread rapidly in the past decade and now poses a  
42 significant long-term threat to the species (Black et al. 2018; Waipara et al. 2013).

43 Currently, there are few options for controlling or treating *P. agathidicida*. The  
44 main tool for reducing pathogen spread is physical barriers such as walking track  
45 closures and shoe cleaning stations. The only chemical treatment that has been used in  
46 the field is phosphite (phosphorous acid). In trunk injection field trials, phosphite  
47 improved canopy health, and reduced lesion activity and expansion (Horner et al. 2015).  
48 However, potential phytotoxic effects (Bradshaw et al. 2020; Horner et al. 2015) and the  
49 potential for resistance to develop (Dobrowolski et al. 2008; Hao et al. 2020) are  
50 concerns regarding phosphite treatment. Other chemical controls have been explored  
51 (Lawrence et al. 2017), including surveying native New Zealand plants for their  
52 production of oomycides (Lawrence et al. 2019), but none of these options has been  
53 field tested to date.

54 Oxathiapiprolin is a first-in-class piperindinyl thiazole isoxazoline oomycide  
55 (Pasteris et al. 2016) that is highly effective against many oomycete species when  
56 applied preventatively or curatively (Belisle et al. 2019; Bittner et al. 2017; Cohen 2015;  
57 Cohen et al. 2018; Gray et al. 2018; Humann et al. 2019; Ji and Csinos 2015; Miao et al.

58 2016b; Miao et al. 2016a; Qu et al. 2016a). It can be applied *via* foliar sprays, soil  
59 applications (*e.g.* in-furrow) or soil drenches and it is efficiently translocated throughout  
60 plant tissues in a variety of horticultural species (Cohen 2015, 2020; Qu et al. 2016b),  
61 including perennial tree crops (Gray et al. 2020). In addition, oxathiapiprolin has low  
62 phytotoxic effects in host tissue. For example, in downy mildew infected sunflower, the  
63 highest tested concentrations of oxathiapiprolin were effective in treating disease while  
64 also causing no phytotoxic effects (Humann et al. 2019).

65 The intracellular target of oxathiapiprolin is an oxysterol binding protein (OSBP)-  
66 related protein (ORP) (Bittner et al. 2017; Miao et al. 2018; Miao et al. 2016b; Pasteris et  
67 al. 2016). While the precise function of ORPs in oomycetes is unknown, this family of  
68 proteins exists throughout eukaryotes and its members are involved in a broad range of  
69 functions including intracellular sterol transport, lipid metabolism, and signal transduction  
70 (Raychaudhuri and Prinz 2010).

71 In this study, we have annotated the sequence of the *P. agathidicida* ORP1 gene  
72 (*PaORP1*). In two geographically distinct isolates of *P. agathidicida*, we have assessed  
73 the efficacy of oxathiapiprolin against different stages in the lifecycle including mycelial  
74 growth, and both motility and germination of the infectious zoospores. By designing a  
75 protocol to purify the metabolically dormant survival spores (oospores), we were also  
76 able to test the efficacy of oxathiapiprolin against this life cycle stage, for the first time for  
77 any *Phytophthora* species. Overall, our work establishes a baseline that strongly  
78 supports field testing of oxathiapiprolin for the management of kauri dieback disease.

79

## 80 **Materials and Methods**

81

### 82 *Materials*

83

84 *P. agathidicida* isolates NZFS 3770 and NZFS 3772 were obtained from the  
85 culture collection held at Scion (Rotorua, New Zealand). *P. agathidicida* 3770 was  
86 originally isolated from Coromandel, New Zealand, while 3772 was isolated near  
87 Auckland, New Zealand (Studholme et al. 2016). Oxathiapiprolin ( $\geq 98\%$  purity) was

88 purchased from Carbosynth (Compton, Berkshire, UK). It was stored at 1 mg/ml in 100%  
89 dimethyl sulfoxide (DMSO) at -20 °C. To account for possible solvent effects, DMSO  
90 concentrations were standardized and DMSO-only controls were performed in all  
91 experiments. Pimaricin (2.5%, w/v, aqueous solution), rifampicin,  
92 pentachloronitrobenzene,  $\beta$ -sitosterol and fluorescein diacetate were from Sigma  
93 Chemical Co. (St. Louis, MO, USA). Ampicillin was from GoldBio (St. Louis, MO, USA).  
94 TOTO-3 iodide was from Invitrogen. Brightfield microscopy was performed using an  
95 Olympus CKX53 inverted light microscope with Olympus cellSens Standard software for  
96 image processing.

97

### 98 *Bioinformatics*

99

100 The *ORP1* gene sequences from *P. capsici*, *P. infestans*, *P. ramorum* and *P.*  
101 *sojiae* have been published in the patent literature (Andreassi et al. 2013). Each was  
102 used as the query sequence for a pairwise alignment with the *P. agathidicida* 3772 draft  
103 genome (Studholme et al. 2016) using Parasail 2.4.1 (Daily 2016), implemented within  
104 SnapGene 5.0.7. A candidate transcriptional start site and a likely intron were annotated  
105 using the *Phytophthora* consensus sequences described previously (Kamoun 2003).  
106 The translated sequence of the *PaORP1* protein was analyzed using ProtParam  
107 (Gasteiger et al. 2005), and the domains were identified using the NCBI Batch  
108 Conserved Domain Search tool (Lu et al. 2020).

109

### 110 *Routine culture conditions*

111

112 *P. agathidicida* was cultured at 22 °C in the dark, unless otherwise noted. *P.*  
113 *agathidicida* isolates were initially cultured on selection plates comprising cornmeal agar  
114 (BD Difco; 17 g/l) supplemented with pimaricin (0.001%, w/v), ampicillin (250  $\mu$ g/ml),  
115 rifampicin (10  $\mu$ g/ml) and pentachloronitrobenzene (100  $\mu$ g/ml). A 6 mm diameter  
116 section of the leading edge of mycelia was transferred to a clarified V8 agar plate.

117 Clarified V8 agar was prepared by mixing 200 ml of Campbell's V8 juice with 2 g CaCO<sub>3</sub>  
118 on a magnetic stirrer for 10 min at room temperature. Next, it was clarified by  
119 centrifugation at 7000g for 10 min. The clarified juice (200 ml) was added to 800 ml of  
120 distilled, deionized water (ddH<sub>2</sub>O) with 15 g of bacteriological grade agar (Formedium,  
121 Hunstanton, UK) and sterilized by autoclaving. The isolates were then maintained by  
122 routinely transferring them to new clarified V8 agar plates for the duration of the study.

123

#### 124 *Mycelial growth inhibition testing*

125

126 Mycelial growth inhibition was measured on potato dextrose agar plates (BD  
127 Difco; 39 g/l). Initially, 6 mm diameter agar plugs were taken from the leading edge of  
128 mycelial growth on clarified V8 plates and transferred to potato dextrose plates  
129 amended with varying concentrations of oxathiapiprolin. The plates were then incubated  
130 at 22 °C in the dark for five days, with images subsequently taken of each plate. For  
131 each replicate, six radial measurements were taken from the centre of the outermost  
132 point of growth and averaged. The concentration of oxathiapiprolin required to effect  
133 50% growth inhibition (the EC<sub>50</sub>) was calculated using GraphPad Prism Version 8 by  
134 plotting log-transformed oxathiapiprolin concentration against the average radius of  
135 growth.

136

#### 137 *Zoospore production and testing*

138

139 To produce zoospores, ten 6 mm diameter agar plugs were taken from the  
140 leading edge of mycelial growth on clarified V8 agar plates using a cork borer and added  
141 to 15 ml of 2% (w/v) carrot broth amended with 15 µg/ml β-sitosterol in 90 mm Petri  
142 dishes. For 1 l of 2% (w/v) carrot broth, 20 g of frozen carrots were blended for 30 s in  
143 500 ml of ddH<sub>2</sub>O. The resulting mixture was then filtered through four layers of miracloth  
144 (Merck). The volume was brought up to 1 l with ddH<sub>2</sub>O and sterilized by autoclaving. The  
145 dishes containing agar plugs were incubated in the dark for 30 h at 22 °C. The carrot

146 broth was then removed and the mycelial mats were washed with 15 ml of a sterile soil  
147 solution for 45 min. This had been prepared by stirring a 2% (w/v) solution of topsoil in  
148 ddH<sub>2</sub>O on a magnetic stirrer for 4 h at room temperature. After stirring, the solution was  
149 left to settle overnight. The solution was filtered by passage through four layers of  
150 miracloth (Merck) and then Whatman Grade 1 filter paper, before being sterilized by  
151 autoclaving. After two washes, the mycelial mats were incubated in a further 15 ml of the  
152 soil solution under continuous light for 14 h at 22 °C. The soil solution was then removed  
153 and the mycelial mats were washed with 15 ml of sterile water for 10 min. This water  
154 was removed and 15 ml of sterile water, pre-chilled to 4 °C, was added. The plates were  
155 incubated at 4 °C for 20 min to stimulate zoospore release. The plates were stored at  
156 room temperature until sufficient numbers of zoospore were released (typically 1-2 h).  
157 Zoospores were pooled and counted using 2-chip disposable hemocytometers (Bulldog  
158 Bio, Portsmouth, NH, USA).

159 For motility and germination testing, zoospores were first diluted to a standard  
160 concentration of 5000 zoospores/ml. Next, 990  $\mu$ l of this suspension was added to 24-  
161 well plates containing 10  $\mu$ l of oxathiapiprolin at 100 $\times$  the desired final concentration. For  
162 motility assays, zoospores were observed using brightfield microscopy at time intervals  
163 of 0, 10, 20, 30, 60, 90, 120, 150, 180, 210, and 240 min, or until complete loss of  
164 movement was observed. Following 240 min of observation, the 24-well plates were  
165 stored at 22°C overnight in the dark to assess germination. The following morning,  
166 zoospore germination was measured by counting 25 randomly-selected zoospores per  
167 well, with germinated spores being those with germ tubes at least twice the diameter of  
168 the spore. EC<sub>50</sub> values for germination were calculated using GraphPad Prism Version  
169 8. The total number of germinated spores was plotted against the log-transformed  
170 concentration of oxathiapiprolin.

171

172 *Oospore isolation and testing*

173

174 For oospore production, three plugs (~3 mm diameter) were taken from the edge  
175 of actively growing mycelia and transferred to a 90 mm Petri dish containing 15 ml  
176 oospore growth medium (4% (w/v) carrot broth filtered through Whatman Grade 1 filter  
177 paper and supplemented with 12  $\mu\text{g/ml}$   $\beta$ -sitosterol prior to autoclaving). The cultures  
178 were incubated in the dark for 4-6 weeks at 22 °C. The resulting mycelial mats were  
179 then transferred using sterile tweezers to 50 ml tubes and suspended in 40 ml of sterile  
180 water. To separate the oospores from mycelia, the solution was homogenised for 1 min  
181 (D160 Tissue Homogeniser, DLAB), then sonicated at 20% amplitude for 1 min (500  
182 Watt Ultrasonic Cell Disruptor with a 5 mm probe, Sonics & Materials, Inc) and filtered  
183 through 100  $\mu\text{m}$  and 40  $\mu\text{m}$  EASYstrainers (Greiner). The filtered oospore suspension  
184 was pelleted at 1200g for 10 min, the supernatant removed, and the oospore pellet was  
185 resuspended in 5 ml of sterile water. Oospore numbers were estimated using disposable  
186 C-Chip haemocytometers (Bulldog Bio). Purified oospores were stored at 4 °C in the  
187 dark.

188 Germination assays were set up in 96-well plates with ~1000 oospores per well.  
189 A kauri root extract was used to stimulate germination. To prepare the extract, kauri  
190 roots were harvested, finely ground in a blender and added to water at 10% (w/v). This  
191 suspension was incubated overnight at room temperature with constant mixing. The  
192 resulting liquid was sterilized by passing through a 0.22  $\mu\text{m}$  syringe-driven filter.  
193 Germination assays contained 10  $\mu\text{l}$  of this kauri root extract, along with oxathiapiprolin  
194 at varying concentrations, in a total volume of 100  $\mu\text{l}$ . Control wells included the same  
195 concentration of DMSO as sample wells. The plates were incubated under continuous  
196 light for 5 days at 22 °C. Oospores were imaged using brightfield microscopy at 40 $\times$   
197 combined magnification.

198 Oospore viability assays were carried out as we have described in detail  
199 elsewhere (Fairhurst and Gerth 2021). Oxathiapiprolin at the indicated concentration  
200 was added to ~2500 oospores in a total volume of 100  $\mu\text{l}$ . The treated oospores were  
201 incubated at 22 °C in the dark for 2 days prior to live/dead staining. Oospores were then  
202 pelleted at 1200g for 10 min and the supernatant was removed. Next, 10  $\mu\text{l}$  of

203 fluorescein diacetate (live stain; 200  $\mu$ M) was added to the oospores and incubated at  
204 37°C in the dark for 20 h. Then 10  $\mu$ l of TOTO-3 iodide (dead stain; 20  $\mu$ M) was added  
205 and the oospores further incubated at 37°C, in the dark for 4 h. Stained oospores were  
206 imaged using a fluorescence microscope (Olympus BX63) at 40 $\times$  magnification using  
207 the green filter for fluorescein (excitation 465-495 nm, emission 515-555 nm) and red  
208 filter for TOTO-3 iodide (excitation 540-580 nm, emission 590-665 nm). As a control for  
209 the live/dead staining and image analysis, oospores were rendered non-viable by heat  
210 treatment (98 °C, 24 h) before being stained and analyzed in parallel with the  
211 oxathiapiprolin-treated samples. Oospores were automatically counted by analyzing the  
212 images with CellProfiler v3.1.8 (McQuin et al. 2018) and the data were further processed  
213 and visualized as described elsewhere (Fairhurst and Gerth 2021).

214

### 215 *Detached leaf assays*

216

217 Using a sterilized scalpel, a 2 mm incision was made 1 cm from the base of each  
218 freshly harvested kauri leaf. Three leaves were placed in a 90 mm Petri dish and each  
219 was spray coated with 200  $\mu$ l of oxathiapiprolin at the indicated concentration. A 6 mm  
220 diameter agar plug of *P. agathidicida* was taken from the leading edge of mycelial  
221 growth and placed over the incision on each leaf. The plates were stored at 22 °C in a  
222 12 h light : 12 h dark cycle with a dampened paper towel to prevent leaf drying. The  
223 leaves were imaged daily for 10 days. The length of lesion spread was measured using  
224 ImageJ (<https://imagej.nih.gov/ij/>).

225

## 226 **Results**

227

### 228 *Gene annotation and protein domain analysis*

229

230 In *Phytophthora*, the biochemical target of oxathiapiprolin is the ORP1 protein  
231 (Bittner et al. 2017; Miao et al. 2018; Miao et al. 2016b; Pasteris et al. 2016). Before



232 beginning our experimental studies, we endeavoured to identify the ORP1 ortholog in *P.*  
233 *agathidicida*. An unannotated, partly-assembled genome for *P. agathidicida* isolate  
234 NZFS 3772 has been reported (Studholme et al. 2016). Simple pairwise alignments  
235 identified a highly conserved ortholog of 2,973 bp contained entirely within contig 1930  
236 of the draft genome sequence.

237 A previous survey identified a conserved 16 bp motif (GCTCATTYBNNNWTTY)  
238 surrounding the transcriptional start site of many oomycete genes, typically 50-100 bp  
239 upstream of the start codon (Kamoun 2003). The *P. agathidicida* ORP1 gene (*PaORP1*)  
240 has a near-perfect match to this consensus (GAGCACTCGGCCTTTC; mismatches  
241 underlined) located 153 bp upstream of the predicted start codon. In the same survey, it  
242 was also noted that introns are relatively rare in *Phytophthora* genes, but that there are  
243 conserved sequences at the 5' and 3' exon-intron junctions (5'-GTRNGT...YAG-3') and  
244 a conserved intronic motif (CTAAC) important for splicing (Kamoun 2003). These  
245 features clearly define an intron sequence of 90 bp in *PaORP1*, the splicing of which  
246 also removes two in-frame termination codons. Thus, *PaORP1* encodes a 960-residue  
247 protein. The annotated sequence of *PaORP1* is shown in Supplementary Fig. S1.

248 The *PaORP1* protein is estimated to have a molecular weight of 104.4 kDa and  
249 an isoelectric point (pI) of 6.5. Across the eukaryotes, ORP proteins are identified by a  
250 signature motif (canonically EQVSHHPP), which in turn is found within the highly-  
251 conserved OSBP-related domain (ORD) (Raychaudhuri and Prinz 2010). In the ORP1  
252 proteins from *P. infestans*, *P. capsici* and *P. sojae*, the signature motif is EHTSHHPP  
253 (Andreassi et al. 2013; Miao et al. 2018). *PaORP1* has the same EHTSHHPP sequence  
254 as these other *Phytophthora* orthologs and it is found at residues 728-735  
255 (Supplementary Fig. S1). Also similar to ORP1 proteins from other *Phytophthora*  
256 species (Andreassi et al. 2013), *PaORP1* is predicted to have a pleckstrin homology  
257 (PH) domain at its N-terminus, followed by a StAR-related lipid transfer (START)  
258 domain. The third domain in the primary sequence is the ORD, which is 95-97%  
259 identical to those from the other *Phytophthora* species we analyzed. The overall domain  
260 organisation of *PaORP1* is shown in Fig. 1.

261           Altogether, these bioinformatic analyses confirmed that *P. agathidicida* contains  
262 the protein target for oxathiapiprolin (*PaORP1*) and that, based on the high level of  
263 sequence identity to its orthologs, it was likely to be highly sensitive to this oomycide.

264

#### 265 *Inhibitory effects on mycelia and zoospores*

266

267           Oxathiapiprolin is best known for its severely inhibitory effects on mycelial growth  
268 (Gray et al. 2018; Ji and Csinos 2015; Miao et al. 2016b; Miao et al. 2016a). Its effects  
269 on mycelial growth of the two *P. agathidicida* isolates (3770 and 3772) were tested at  
270 concentrations ranging from 0.01 ng/ml to 4 ng/ml. For both isolates the EC<sub>50</sub> was  
271 calculated to be approximately 0.1 ng/ml (Table 1). This indicates that *P. agathidicida*  
272 mycelia are approximately 5- to 10-fold more sensitive to oxathiapiprolin than those from  
273 well-characterized species such as *P. capsici* and *P. nicotianae* (Table 1), with a  
274 similarly low EC<sub>50</sub> to that determined for *P. syringae* (Gray et al. 2018).

275           The motile zoospores of *P. agathidicida* are a potential target for antimicrobials  
276 because it is they that initiate new infections by encysting and germinating on the root of  
277 the host kauri (Bellgard et al. 2016). We previously tested a range of antimicrobials and  
278 plant-derived natural products for their effects on the germination and motility of *P.*  
279 *agathidicida* zoospores (Lawrence et al. 2017; Lawrence et al. 2019). Oxathiapiprolin  
280 inhibits zoospore germination and (more weakly) motility in other oomycetes (Cohen  
281 2015; Gray et al. 2018; Ji and Csinos 2015). Therefore, we set out to implement our  
282 previous methods to determine the effects of oxathiapiprolin on *P. agathidicida*  
283 zoospores.

284           The EC<sub>50</sub> values for inhibiting zoospore germination in isolates 3770 and 3772  
285 were 9 ng/ml and 2 ng/ml oxathiapiprolin respectively (Table 1). These values are  
286 similar to the EC<sub>50</sub> reported for oxathiapiprolin acting against *P. citrophora* (Gray et al.  
287 2018) and from a study on one isolate of *P. capsici* (Miao et al. 2016a), but  
288 approximately two orders of magnitude lower than the average determined for 126 *P.*  
289 *capsici* isolates in a different study (Ji and Csinos 2015).

290 For zoospore motility, the results were similar for isolates 3770 and 3772 across  
291 three independent preparations of zoospores (Table 2). In controls lacking  
292 oxathiapiprolin, zoospores remained motile for 180-240 min. A slight reduction in motility  
293 was first seen at 0.001  $\mu\text{g/ml}$  oxathiapiprolin, which was a 10-fold higher concentration  
294 than the  $\text{EC}_{50}$  for mycelial growth. Higher concentrations of oxathiapiprolin reduced  
295 zoospore motility to a greater degree, but even at 1  $\mu\text{g/ml}$  (10,000-fold higher than the  
296 mycelial  $\text{EC}_{50}$ ) zoospores remained motile for 60 min (Table 2). Comparable results  
297 have been observed for *Pseudoperonospora cubensis*, the oomycete pathogen of  
298 cucurbits. At 30 min after treatment with 5  $\mu\text{g/ml}$  oxathiapiprolin, 25% of *P. cubensis*  
299 zoospores remained motile (Cohen 2015). On the other hand, we previously showed  
300 that copper (II) fungicides (Lawrence et al. 2017) and New Zealand native plant-derived  
301 flavonoids (Lawrence et al. 2019) rapidly immobilized *P. agathidicida* zoospores at  
302 concentrations that were significantly lower than their  $\text{EC}_{50}$  values for mycelial growth  
303 inhibition.

304

### 305 *Inhibitory effects on oospores*

306

307 Oospores are key survival propagules in soil for many *Phytophthora* species  
308 (Erwin and Ribeiro 1996), particularly those such as *P. agathidicida* that do not produce  
309 chlamydospores (Weir et al. 2015). They can lie dormant for years and germinate under  
310 the right conditions, leading to the formation of sporangia, release of zoospores, and  
311 thus new infections. The dormant oospores are easy to transfer between sites, such as  
312 on shoes bearing contaminated soil, making them an important consideration for  
313 minimizing disease spread. Oxathiapiprolin is highly effective at preventing mycelial  
314 mats of *P. nicotianae* from producing oospores (Gray et al. 2018). However, it is  
315 technically challenging to produce pure preparations of oospores and therefore, to test  
316 the effects of oomycides upon them. To the best of our knowledge, no-one has  
317 investigated the direct effects of oxathiapiprolin on oospores themselves. Here, we have  
318 used our recently developed protocols for producing purified *P. agathidicida* oospores,

319 assessing viability, and for triggering their germination *in vitro*, to test the effects of  
320 oxathiapiprolin on this key lifecycle stage.

321 First, we assessed the effect of oxathiapiprolin on oospore germination.  
322 Oxathiapiprolin concentrations from 0.1  $\mu\text{g/ml}$  to 10  $\mu\text{g/ml}$  completely inhibited  
323 germination (Fig. 2A). On the other hand, live/dead staining showed that oxathiapiprolin  
324 did not render oospores non-viable when applied at the same concentrations (Fig. 2B).  
325 That is, *P. agathidicida* oospores can withstand oxathiapiprolin treatment but cannot  
326 successfully germinate in its presence. Oospores of both *P. agathidicida* isolates (3770  
327 and 3772) behaved identically in these tests.

328

### 329 *Detached Leaf Assays*

330

331 Detached leaf assays provide a simple measure of infectivity on host plants (Goth  
332 and Keane 1997; Pettitt et al. 2011). They can be used to assess whether test  
333 compounds are preventative and/or curative (Cohen et al. 2018). Here, we tested  
334 oxathiapiprolin for its preventative effects. Kauri leaves were damaged and then sprayed  
335 with oxathiapiprolin at different concentrations, before being inoculated with each isolate  
336 of *P. agathidicida*. The onset of infection for untreated kauri leaves was observed at 4-5  
337 days for both isolates. In contrast, pre-treatment with low concentrations of  
338 oxathiapiprolin (0.1  $\mu\text{g/ml}$  and 1  $\mu\text{g/ml}$ ) delayed the onset of infection until day 8 and day  
339 9, respectively (Fig. 3). The highest concentration of oxathiapiprolin (10  $\mu\text{g/ml}$ )  
340 completely inhibited infection during the ten-day observation period.

341

## 342 **Discussion**

343

344 Oxathiapiprolin is a novel oomycide that is highly active against many species of  
345 *Phytophthora* at extremely low concentrations (Belisle et al. 2019; Gray et al. 2018; Ji  
346 and Csinos 2015; Pasteris et al. 2016). In this study we sought to determine its  
347 effectiveness against multiple lifecycle stages of *P. agathidicida*, the causative agent of  
348 kauri dieback disease. Similar to observations for other *Phytophthora* species,

349 oxathiapiprolin was effective against mycelial growth and zoospore germination at  
350 concentrations far below 1  $\mu\text{g/ml}$  (Table 1). Indeed, the measured  $\text{EC}_{50}$  values for  
351 mycelial growth indicate that *P. agathidicida* mycelia are even more sensitive to  
352 oxathiapiprolin than well-studied species such as *P. capsici* and *P. cinnamomi* (Belisle  
353 et al. 2019; Ji and Csinos 2015; Miao et al. 2016b). Oxathiapiprolin was also effective at  
354 delaying or preventing the infection of kauri leaves, albeit at higher concentrations (Fig.  
355 3). On the other hand, it failed to render zoospores immotile in less than an hour (Table  
356 2). Overall, its inhibitory effects were comparable for the two geographically distinct *P.*  
357 *agathidicida* isolates 3770 and 3772.

358 In assessing the effects of oxathiapiprolin on the *P. agathidicida* lifecycle, a  
359 particular focus was how it affects oospores. This is an often-overlooked aspect of  
360 oomycide efficacy. If a compound is effective at inhibiting mycelial growth *in planta*, yet  
361 ineffective at inhibiting oospore germination and/or viability, disease can readily re-  
362 emerge from tissues containing oospores, or new infections can rapidly initiate from  
363 oospore-containing soil. The only previous study of *P. agathidicida* oospores showed  
364 that viability is largely unaffected by Trigene (a commercial disinfectant containing  
365 halogenated tertiary amines), salt water immersion or various pH treatments, with  
366 substantial heat treatment being the only effective measure for reducing viability *in vitro*  
367 (Dick and Kimberly 2013). Here we found oxathiapiprolin to be highly effective at  
368 inhibiting germination, but like these other treatments it was ineffective at reducing  
369 oospore viability (Fig. 2). Our results highlight the importance of assessing as many  
370 lifecycle stages as possible when testing new oomycides, in order to obtain a complete  
371 picture of their effectiveness.

372 Trunk injection of phosphite is the only chemical treatment currently being used  
373 against confirmed cases of kauri dieback (Bradshaw et al. 2020; Horner et al. 2015).  
374 Here we have conducted the first tests to establish whether oxathiapiprolin should also  
375 be considered. Currently in New Zealand, oxathiapiprolin (sold as Zorvec Enicade:  
376 <https://www.corteva.co.nz/products-and-solutions/crop-protection/zorvec-enicade.html>)  
377 is only approved for the control of *Peronospora destructor* (downy mildew) in bulb onion.  
378 However, our results show that oxathiapiprolin is also highly effective against several

379 key lifecycle stages of *P. agathidicida*. By acting at sub-microgram per millilitre  
380 concentrations to inhibit mycelial growth, zoospore germination and oospore  
381 germination (albeit *in vitro*), oxathiapiprolin emerges as a promising candidate for further  
382 testing. Inhibiting zoospore and oospore germination highlights its potential as a  
383 preventative agent, whereas its extreme effectiveness against mycelial growth suggests  
384 it may also act curatively, even in large trees. Future studies should focus on  
385 determining the optimal dosage, application method, uptake and overall efficacy *in*  
386 *planta*. Ultimately, field trials of oxathiapiprolin against confirmed cases of kauri dieback  
387 will be a critical part of the ongoing efforts to protect kauri, which are unique taonga  
388 (treasures) of New Zealand.

389

390 **Funding:** This work was supported *via* strategic research funds from the School of  
391 Biological Sciences at Victoria University of Wellington.

392

## 393 **References**

394

395 Andreassi, J., Gutteridge, S., Pember, S., Sweigard, J., and Rehberg, E. 2013. WO  
396 2013/009971 A1. US patent.

397 Belisle, R. J., Hao, W., McKee, B., Arpaia, M. L., Manosalva, P., and Adaskaveg, J. E.  
398 2019. New oomycota fungicides with activity against *Phytophthora cinnamomi* and  
399 their potential use for managing avocado root rot in California. *Plant Dis.* 103:2024-  
400 2032.

401 Bellgard, S. E., Padamsee, M., Probst, C. M., Lebel, T., and Williams, S. E. 2016.  
402 Visualizing the early infection of *Agathis australis* by *Phytophthora agathidicida*,  
403 using microscopy and fluorescent *in situ* hybridization. *Forest Pathol.* 46:622-631.

404 Bittner, R. J., Sweigard, J. A., and Mila, A. L. 2017. Assessing the resistance potential of  
405 *Phytophthora nicotianae*, the causal agent of black shank of tobacco, to  
406 oxathiopropalin with laboratory mutants. *Crop Prot.* 102:63-71.

407 Black, A., Waipara, N., and Gerth, M. 2018. Calling time on New Zealand's oldest tree  
408 species. *Nature* 561:177.

- 409 Bradshaw, R. E., Bellgard, S. E., Black, A., Burns, B. R., Gerth, M. L., McDougal, R. L.,  
410 Scott, P. M., Waipara, N. W., Weir, B. S., Williams, N. M., Winkworth, R. C.,  
411 Ashcroft, T., Bradley, E. L., Dijkwel, P. P., Guo, Y., Lacey, R. F., Mesarich, C. H.,  
412 Panda, P., and Horner, I. J. 2020. *Phytophthora agathidicida*: research progress,  
413 cultural perspectives and knowledge gaps in the control and management of kauri  
414 dieback in New Zealand. *Plant Pathol.* 69:3-16.
- 415 Cohen, Y. 2015. The novel oomycide oxathiapiprolin inhibits all stages in the asexual life  
416 cycle of *Pseudoperonospora cubensis* – causal agent of cucurbit downy mildew.  
417 *PLoS One* 10:e0140015.
- 418 Cohen, Y. 2020. Root treatment with oxathiapiprolin, benthiavalicarb or their mixture  
419 provides prolonged systemic protection against oomycete foliar pathogens. *PLoS*  
420 *One* 15:e0227556.
- 421 Cohen, Y., Rubin, A. E., and Galperin, M. 2018. Oxathiapiprolin-based fungicides  
422 provide enhanced control of tomato late blight induced by mefenoxam-insensitive  
423 *Phytophthora infestans*. *PLoS One* 13:e0204523.
- 424 Daily, J. 2016. Parasail: SIMD C library for global, semi-global, and local pairwise  
425 sequence alignments. *BMC Bioinform.* 17:81.
- 426 Dick, M. A., and Kimberly, M. O. 2013. Deactivation of oospores of *Phytophthora* taxon  
427 Agathis. Scion client report number MPI 15775; accessed at  
428 [https://www.kauridieback.co.nz/media/1633/2013-15775-deactivation-of-oospores-](https://www.kauridieback.co.nz/media/1633/2013-15775-deactivation-of-oospores-of-phytophthora-taxon-agathis-dick.pdf)  
429 [of-phytophthora-taxon-agathis-dick.pdf](https://www.kauridieback.co.nz/media/1633/2013-15775-deactivation-of-oospores-of-phytophthora-taxon-agathis-dick.pdf) (Dec 30, 2020).
- 430 Dobrowolski, M. P., Shearer, B. L., Colquhoun, I. J., O'Brien, P. A., and Hardy, G. E. S.  
431 2008. Selection for decreased sensitivity to phosphite in *Phytophthora cinnamomi*  
432 with prolonged use of fungicide. *Plant Pathol.* 57:928-936.
- 433 Erwin, D. C., and Ribeiro, O. K. 1996. *Phytophthora* diseases worldwide. APS Press, St.  
434 Paul, MN, USA.
- 435 Fairhurst, M. J., Deslippe, J. R., and Gerth, M. L. 2021. A fluorescence-based viability  
436 assay for *Phytophthora agathidicida* oospores. bioRxiv.
- 437 Gasteiger, E., Hoogland, C., Gattiker, A., Duvaud, S., Wilkins, M. R., Appel, R. D., and  
438 Bairoch, A. 2005. Protein identification and analysis tools on the ExPASy server.

- 439 Pages 571-607 in: The Proteomics Protocols Handbook. J. M. Walker, ed. Humana  
440 Press.
- 441 Goth, R. W., and Keane, J. 1997. A detached-leaf method to evaluate late blight  
442 resistance in potato and tomato. *Am. Potato J.* 74:347-352.
- 443 Gray, M. A., Hao, W., Forster, H., and Adaskaveg, J. E. 2018. Baseline sensitivities of  
444 new fungicides and their toxicity to selected life stages of *Phytophthora* species from  
445 citrus in California. *Plant Dis.* 102:734-742.
- 446 Gray, M. A., Nguyen, K. A., Hao, W., Belisle, R. J., Forster, H., and Adaskaveg, J. E.  
447 2020. Mobility of oxathiapiprolin and mefenoxam in citrus seedlings after root  
448 application and implications for managing *Phytophthora* root rot. *Plant Dis.*  
449 104:3159-3165.
- 450 Hansen, E. M., Reeser, P. W., and Sutton, W. 2012. *Phytophthora* beyond agriculture.  
451 *Annu. Rev. Phytopathol.* 50:359-378.
- 452 Hao, W., Forster, H., and Adaskaveg, J. 2020. Resistance to potassium phosphite in  
453 *Phytophthora* species causing citrus brown rot and integrated practices for  
454 management of resistant isolates. *Plant Dis.* Online ahead of print:  
455 <https://doi.org/10.1094/PDIS-1006-1020-1414-RE>.
- 456 Haverkort, A. J., Boonekamp, P. M., Hutten, R., Jacobsen, E., Lotz, L. A. P., Kessel, G.  
457 J. T., Visser, R. G. F., and van der Vossen, E. A. G. 2008. Societal costs of late  
458 blight in potato and prospects of durable resistance through cisgenic modification.  
459 *Potato Res.* 51:47-57.
- 460 Horner, I. J., Hough, E. G., and Horner, M. B. 2015. Forest efficacy trials on phosphite  
461 for control of kauri dieback. *N. Z. Plant Prot.* 68:7-12.
- 462 Humann, R. M., Johnson, K. D., Wunsch, M. J., Meyer, S. M., Jordahl, J. G., Bauske, E.  
463 C., Halvorson, J. M., Friskop, A. J., O'Bryan, K. A., Gulya, T. J., and Markell, S. G.  
464 2019. Evaluation of oxathiapiprolin for the management of sunflower downy mildew.  
465 *Plant Dis.* 103:2498-2504.
- 466 Ji, P., and Csinos, A. S. 2015. Effect of oxathiapiprolin on asexual life stages of  
467 *Phytophthora capsici* and disease development on vegetables. *Ann. Appl. Biol.*  
468 166:229-235.



- 469 Kamoun, S. 2003. Molecular genetics of pathogenic oomycetes. *Eukaryot. Cell* 2:191-  
470 199.
- 471 Lawrence, S. A., Armstrong, C. B., Patrick, W. M., and Gerth, M. L. 2017. High-  
472 throughput chemical screening identifies compounds that inhibit different stages of  
473 the *Phytophthora agathidicida* and *Phytophthora cinnamomi* life cycles. *Front.*  
474 *Microbiol.* 8:1340.
- 475 Lawrence, S. A., Burgess, E. J., Pairama, C., Black, A., Patrick, W. M., Mitchell, I.,  
476 Perry, N. B., and Gerth, M. L. 2019. Mātauranga-guided screening of New Zealand  
477 native plants reveals flavonoids from kānuka (*Kunzea robusta*) with anti-  
478 *Phytophthora* activity. *J. R. Soc. N. Z.* 49:137-154.
- 479 Lu, S., Wang, J., Chitsaz, F., Derbyshire, M. K., Geer, R. C., Gonzales, N. R., Gwadz,  
480 M., Hurwitz, D. I., Marchler, G. H., Song, J. S., Thanki, N., Yamashita, R. A., Yang,  
481 M., Zhang, D., Zheng, C., Lanczycki, C. J., and Marchler-Bauer, A. 2020.  
482 CDD/SPARCLE: the conserved domain database in 2020. *Nucleic Acids Res.*  
483 48:D265-D268.
- 484 McQuin, C., Goodman, A., Chernyshev, V., Kametsky, L., Cimini, B. A., Karhohs, K.  
485 W., Doan, M., Ding, L., Rafelski, S. M., Thirstrup, D., Wiegraebe, W., Singh, S.,  
486 Becker, T., Caicedo, J. C., and Carpenter, A. E. 2018. CellProfiler 3.0: Next-  
487 generation image processing for biology. *PLoS Biol.* 16:e2005970.
- 488 Miao, J., Li, X., Lin, D., Liu, X., and Tyler, B. M. 2018. Oxysterol-binding protein-related  
489 protein 2 is not essential for *Phytophthora sojae* based on CRISPR/Cas9 deletions.  
490 *Environ. Microbiol. Rep.* 10:293-298.
- 491 Miao, J. Q., Dong, X., Lin, D., Wang, Q. S., Liu, P. F., Chen, F. R., Du, Y. X., and Liu, X.  
492 L. 2016a. Activity of the novel fungicide oxathiapiprolin against plant-pathogenic  
493 oomycetes. *Pest Manag. Sci.* 72:1572-1577.
- 494 Miao, J. Q., Cai, M., Dong, X., Liu, L., Lin, D., Zhang, C., Pang, Z. L., and Liu, X. L.  
495 2016b. Resistance assessment for oxathiapiprolin in *Phytophthora capsici* and the  
496 detection of a point mutation (G769W) in PcORP1 that confers resistance. *Front.*  
497 *Microbiol.* 7:615.

- 498 Pasteris, R. J., Hanagan, M. A., Bisaha, J. J., Finkelstein, B. L., Hoffman, L. E., Gregory,  
499 V., Andreassi, J. L., Sweigard, J. A., Klyashchitsky, B. A., Henry, Y. T., and Berger,  
500 R. A. 2016. Discovery of oxathiapiprolin, a new oomycete fungicide that targets an  
501 oxysterol binding protein. *Bioorg. Med. Chem.* 24:354-361.
- 502 Pettitt, T. R., Wainwright, M. F., Wakeham, A. J., and White, J. G. 2011. A simple  
503 detached leaf assay provides rapid and inexpensive determination of pathogenicity  
504 of *Pythium* isolates to 'all year round' (AYR) chrysanthemum roots. *Plant Pathol.*  
505 60:946-956.
- 506 Qu, T., Shao, Y., Csinos, A. S., and Ji, P. 2016a. Sensitivity of *Phytophthora nicotianae*  
507 from tobacco to fluopicolide, mandipropamid, and oxathiapiprolin. *Plant Dis.*  
508 100:2119-2125.
- 509 Qu, T. L., Grey, T. L., Csinos, A. S., and Ji, P. S. 2016b. Translocation of oxathiapiprolin  
510 in bell pepper plants and systemic protection of plants against *Phytophthora* blight.  
511 *Plant Dis.* 100:1931-1936.
- 512 Raychaudhuri, S., and Prinz, W. A. 2010. The diverse functions of oxysterol-binding  
513 proteins. *Annu. Rev. Cell Dev. Biol.* 26:157-177.
- 514 Studholme, D. J., McDougal, R. L., Sambles, C., Hansen, E., Hardy, G., Grant, M.,  
515 Ganley, R. J., and Williams, N. M. 2016. Genome sequences of six *Phytophthora*  
516 species associated with forests in New Zealand. *Genom. Data* 7:54-56.
- 517 Waipara, N. W., Hill, S., Hill, L. M. W., Hough, E. G., and Horner, I. J. 2013. Surveillance  
518 methods to determine tree health, distribution of kauri dieback disease and  
519 associated pathogens. *N. Z. Plant Prot.* 66:235-241.
- 520 Weir, B. S., Paderes, E. P., Anand, N., Uchida, J. Y., Pennycook, S. R., Bellgard, S. E.,  
521 and Beever, R. E. 2015. A taxonomic revision of *Phytophthora* Clade 5 including two  
522 new species, *Phytophthora agathidicida* and *P. cocois*. *Phytotaxa* 205:21-38.
- 523 Wyse, S. V., Burns, B. R., and Wright, S. D. 2014. Distinctive vegetation communities  
524 are associated with the long-lived conifer *Agathis australis* (New Zealand kauri,  
525 *Araucariaceae*) in New Zealand rainforests. *Austral Ecol.* 39:388-400.

526 **Tables**

527

528

529 **Table 1. EC<sub>50</sub> values for oxathiapiprolin inhibiting selected life cycle stages of *P.***  
530 ***agathidicida* and related species.** 95% confidence intervals are listed in parentheses  
531 (*n* = 3 biological replicates).

532

| Pathogen                            | Mycelial growth EC <sub>50</sub> (ng/ml) | Zoospore germination EC <sub>50</sub> (ng/ml) |
|-------------------------------------|------------------------------------------|-----------------------------------------------|
| <i>P. agathidicida</i> 3770         | 0.13 (0.11 – 0.14)                       | 8.5 (5.2 – 13)                                |
| <i>P. agathidicida</i> 3772         | 0.11 (0.096 – 0.11)                      | 1.8 (0.25 – 3.6)                              |
| <i>P. capsici</i> <sup>a</sup>      | 0.68 (0.54 – 0.85)                       | 6.0 (0.64 – 56)                               |
| <i>P. capsici</i> <sup>b</sup>      | 1.0                                      | 540                                           |
| <i>P. citrophthora</i> <sup>c</sup> | 0.3                                      | 8                                             |
| <i>P. nicotianae</i> <sup>c</sup>   | 0.5                                      | NR <sup>d</sup>                               |
| <i>P. syringae</i> <sup>c</sup>     | 0.1                                      | NR <sup>d</sup>                               |

533 <sup>a</sup> As reported by others (Miao et al. 2016a).

534 <sup>b</sup> Average across 126 isolates, as reported by others (Ji and Csinos 2015).

535 <sup>c</sup> Average across multiple isolates, as reported by others (Gray et al. 2018).

536 <sup>d</sup> NR, not reported.

537

538

539 **Table 2. Oxathiapiprolin inhibition of zoospore motility.** The mean time until  
540 complete loss of motility of all zoospores is listed for each oxathiapiprolin concentration  
541 ( $n = 3$  biological replicates).

542

| <b>[Oxathiapiprolin], <math>\mu\text{g/ml}^a</math></b> | <b>Isolate 3770</b> | <b>Isolate 3772</b> |
|---------------------------------------------------------|---------------------|---------------------|
| 0                                                       | 180 min             | 240 min             |
| 0.001                                                   | 150 min             | 210 min             |
| 0.01                                                    | 90 min              | 120 min             |
| 0.02                                                    | 90 min              | 90 min              |
| 0.04                                                    | 90 min              | 90 min              |
| 0.08                                                    | 60 min              | 90 min              |
| 0.16                                                    | 60 min              | 60 min              |
| 1.0                                                     | 60 min              | 60 min              |

543 <sup>a</sup> Oxathiapiprolin was dissolved in DMSO; therefore DMSO was added to all wells at a final concentration  
544 of 1% (v/v) to control for any solvent effects.

545 **Figures**

546

547

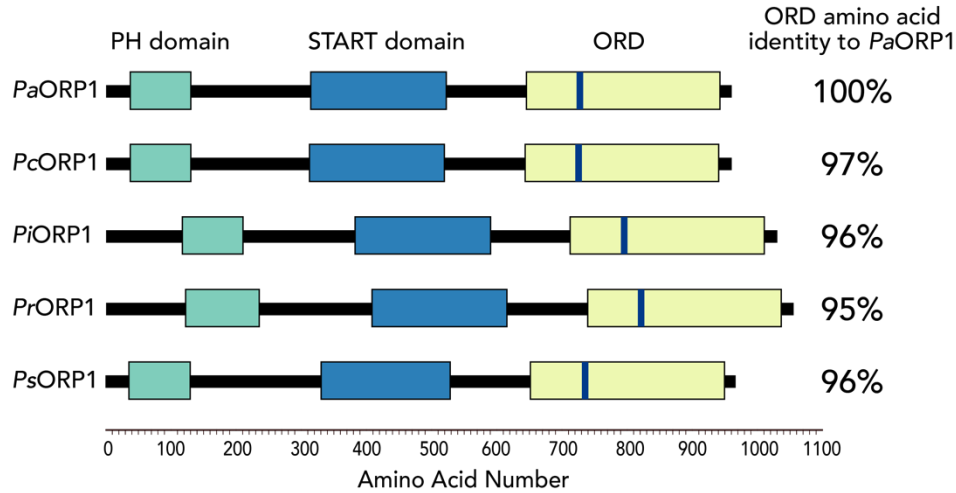

548

549

550 **Fig. 1. Predicted domain architecture of the *PaORP1* protein and comparison with**  
551 **related *Phytophthora* species. *PaORP1* is predicted to be a 960 amino acid protein**  
552 **with an N-terminal pleckstrin homology (PH) domain (green), a StAR-related lipid**  
553 **transfer (START) domain (blue), and the canonical C-terminal OSBP-related domain**  
554 **(ORD; yellow). Within the ORD is the signature motif, EHTSHHPP, indicated by a blue**  
555 **bar. The protein domain architecture is compared with the ORP1 proteins from *P.***  
556 ***capsici* (*PcORP1*), *P. infestans* (*PiORP1*), *P. ramorum* (*PrORP1*), and *P. sojae***  
557 **(*PsORP1*). The amino acid identity between each ORD and the *P. agathidicida***  
558 **sequence is also shown.**

(a)

*P. agathidicida* 3770

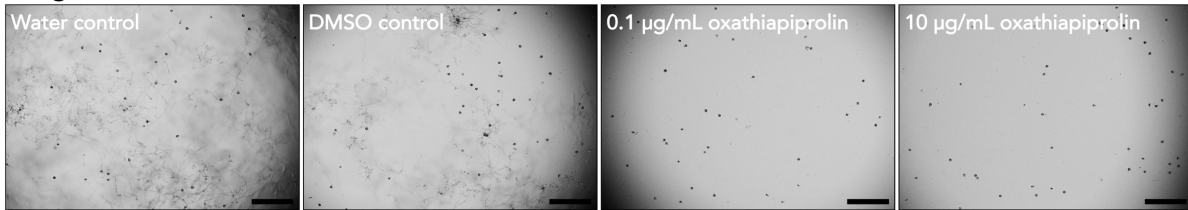

*P. agathidicida* 3772

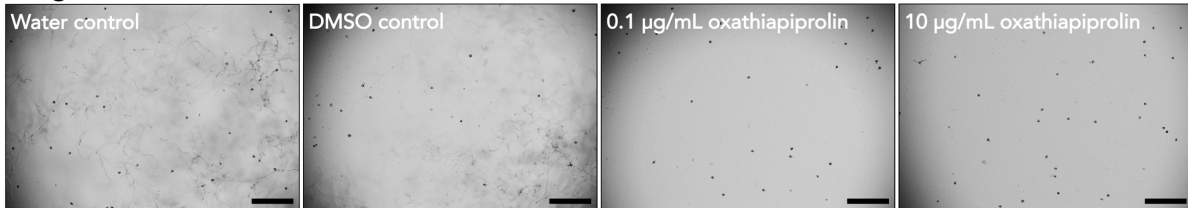

(b)

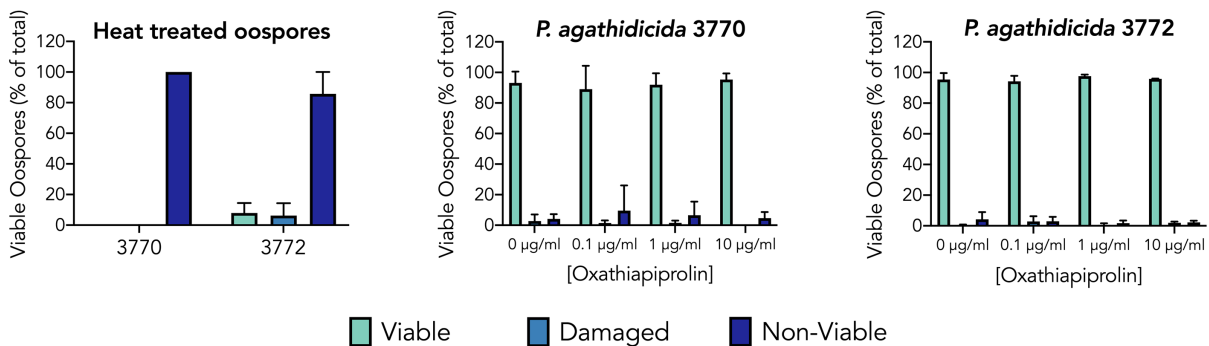

559

560

561 **Fig. 2. Effects of oxathiapiprolin on *P. agathidicida* oospores.** (a) Inverted light  
562 microscopy images of oospores triggered to germinate by the addition of kauri root  
563 extract, in the presence or absence of oxathiapiprolin. New mycelial mats from  
564 germinated oospores could not be captured in a single focal plane so they appear as a  
565 combination of fibrils and hazy shadows in the water-only and DMSO controls. Scale bar  
566 = 250 µm. (b) Results of live/dead staining for oospore viability. The left panel shows the  
567 results from heat treating oospores of each *P. agathidicida* isolate, to verify the viability  
568 screening method. The other panels show the effects of treating each isolate with  
569 varying concentrations oxathiapiprolin. Error bars show the standard deviation from  $n =$   
570 3 independent oospore preparations.

571

572

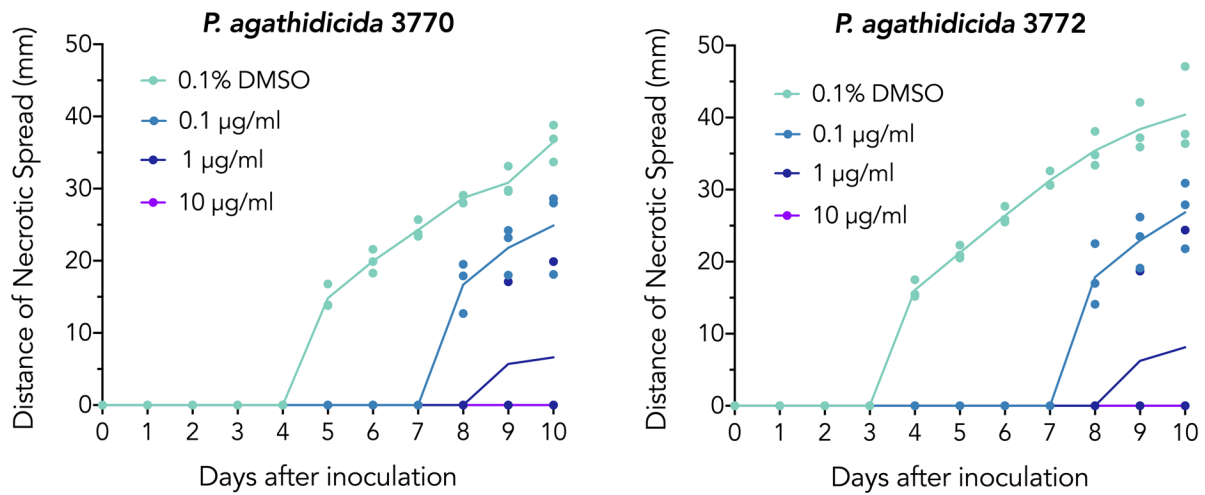

573

574

575 **Fig. 3. Preventative effects of oxathiapiprolin on infection of kauri leaves.**

576 Detached leaf assay results for *P. agathidicida* isolates 3770 (left panel) and 3772 (right

577 panel). The oxathiapiprolin concentrations used to pre-treat leaves are indicated and

578 each data point is shown for  $n = 3$  independent replicates at each concentration. The

579 connecting lines indicate means of the necrotic spread observed for each treatment.

580 Leaf necrosis indicates *P. agathidicida* infection; therefore, reduced or absent necrosis

581 indicates that the treatment has a preventative effect.
